# Supplementary material
Source: Springer Nature journal article supplement (https://www.springermedizin.de/resource/supplementary/13054_2009_8289_MOESM1_ESM.pdf/9731628)

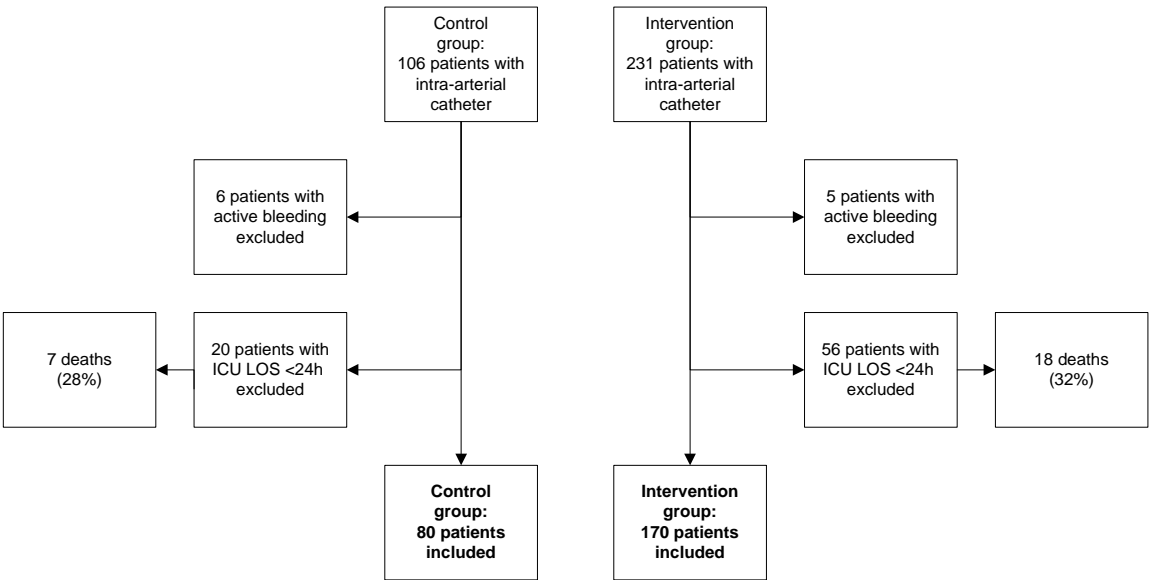

Supplement: MOESM1 [file 9731628]
